# Supplementary material for: Zinc Ion Thermogalvanic Cell: A New Strategy for Low-Grade Heat Conversion and Energy Storage
Source: Research Square preprint supplement (doi:10.21203/rs.3.rs-702045/v1), 2021-07-20
Supplement: Supplementary file 1 [file 7873ce8e2194f99670a70ea7.docx]

Supplemental Information

**Zinc Ion Thermogalvanic Cell: A New Strategy for Low-Grade Heat Conversion and Energy Storage**

Zhiwei Li,1 Yinghong Xu,1 Langyuan Wu,1 Yufeng An,1 Yao Sun,1 Tingting Meng,2 Hui Dou,1 Yimin Xuan,2[[1]](#footnote-1)* Xiaogang Zhang1[[2]](#footnote-2)*

1*Jiangsu Key Laboratory of Electrochemical Energy Storage Technologies, College of Material Science and Engineering, Nanjing University of Aeronautics and Astronautics, Nanjing 211106, China*

2*School of Energy and Power Engineering, Nanjing University of Aeronautics and Astronautics, Nanjing 210016, P. R. China*


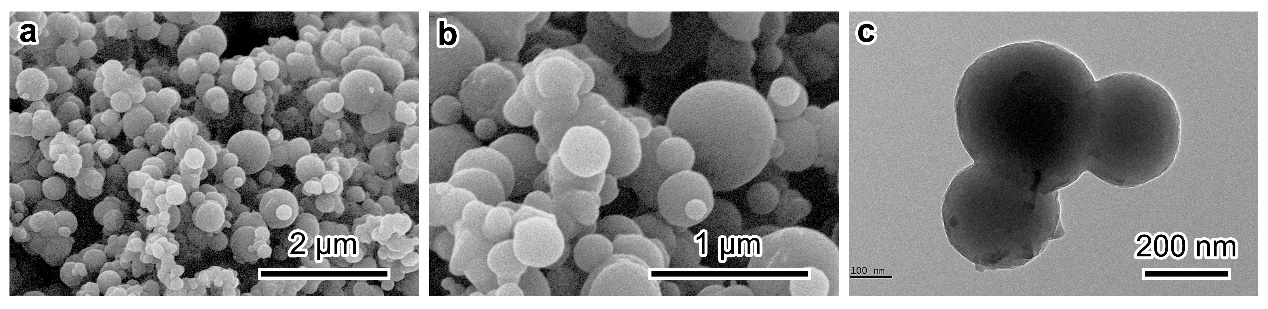


**Fig. S1** SEM and TEM images of PC.


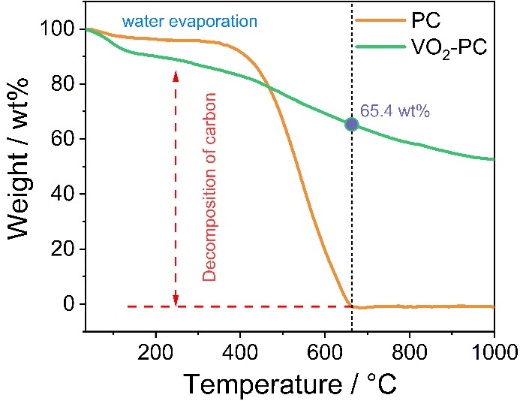


**Fig. S2** TGA curves of PC and VO2-PC.


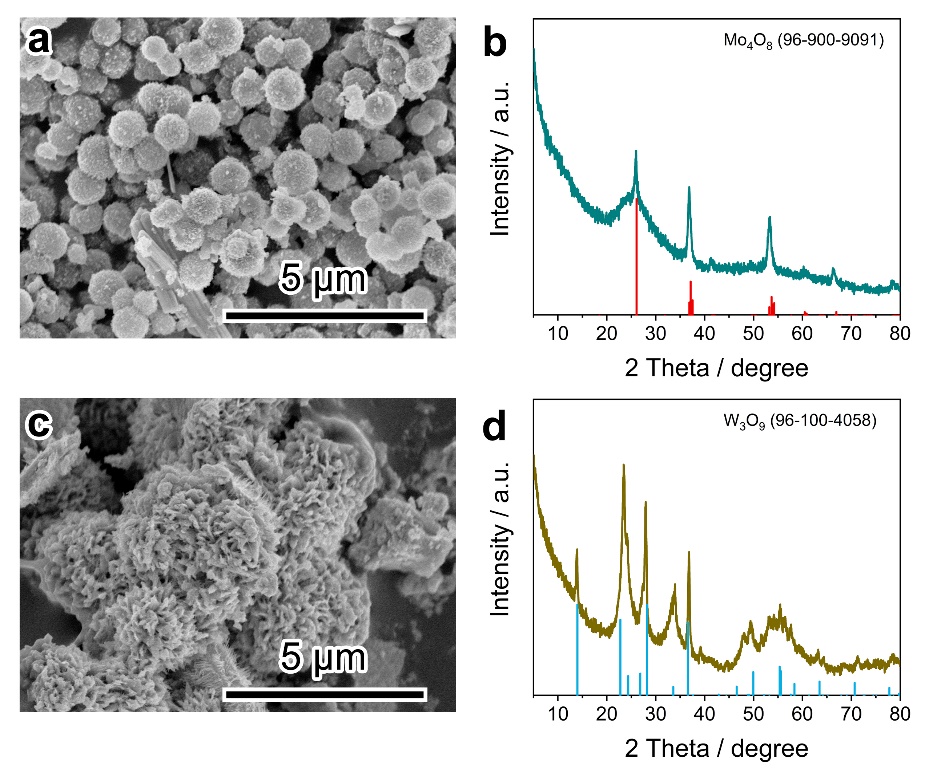


**Fig. S3** The SEM image and XRD pattern for **a,b** Mo4O8 and **c,d** W3O9, respectively.


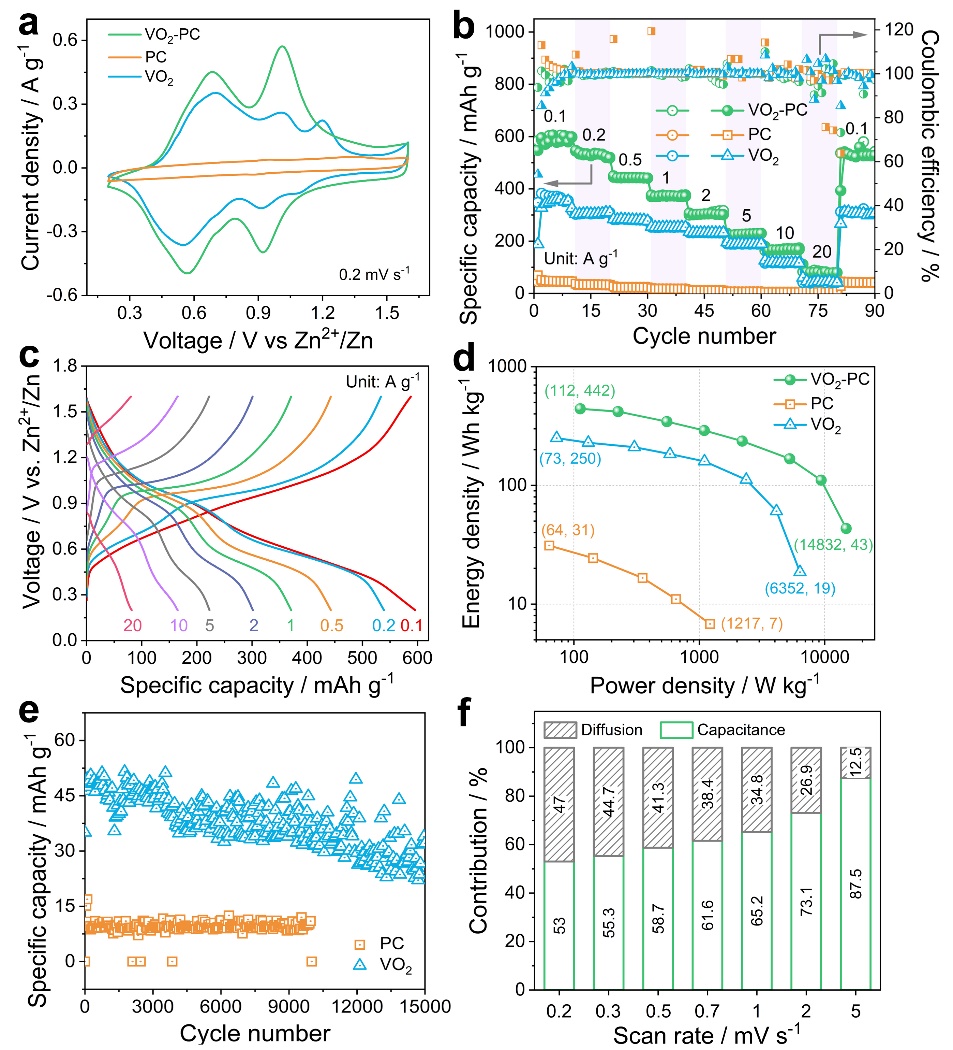


**Fig. S4** **a** CV curves at 0.2 mV s−1 and **b** rate performance of VO2-PC, VO2, and PC. **c** GCD curves of VO2-PC at various current densities. **d** Ragone plots. **e** Cycling stability at 10 A g−1. **f** Capacitive contributions at different scan rates.

1. *Corresponding author

   *E-mail*: azhangxg@nuaa.edu.cn [↑](#footnote-ref-1)
2. *Corresponding author

   *E-mail*: ymxuan@nuaa.edu.cn [↑](#footnote-ref-2)
